# Supplementary material
Source: PubMed Central journal article supplement (PMC3010263)
Supplement: NIHMS253462-supplement-Supporting_Information.pdf [file NIHMS253462-supplement-Supporting_Information.pdf]

# Supporting Information for

## Characterization of Iron Dinitrosyl Species Formed in the Reaction of Nitric Oxide with a Biological Rieske Center

*Christine E. Tinberg,<sup>† §</sup> Zachary J. Tonzetich,<sup>† §</sup> Hongxin Wang,<sup>‡</sup> Loi H. Do,<sup>†</sup> Yoshitaka Yoda,<sup>‡</sup> Stephen  
P. Cramer,<sup>‡ ¥</sup> and Stephen J. Lippard<sup>† \*</sup>*

<sup>†</sup>Department of Chemistry, Massachusetts Institute of Technology, Cambridge, MA 02139

<sup>‡</sup>Physical Biosciences Division, Lawrence Berkeley National Laboratory, Berkeley, CA 94720

<sup>‡</sup>Japan Synchrotron Radiation Research Institute, SPring-8, 1-1-1 Kouto, Sayo-cho, Sayo-gun, Hyogo  
679-5198, Japan

<sup>¥</sup>Department of Applied Science, University of California, Davis, CA 95616

### Contents:

|                    |                                                                                                                        |     |
|--------------------|------------------------------------------------------------------------------------------------------------------------|-----|
| <b>Table S1.</b>   | Mössbauer parameters for ToMOC-derived and synthetic iron dinitrosyl species.                                          | S2  |
| <b>Table S2.</b>   | Dependence on DEANO concentration of rate constants $k_{\text{obs}1}$ , $k_{\text{obs}2}$ , and $k_{\text{obs}3}$ .    | S2  |
| <b>Figure S1.</b>  | UV-vis spectra for the reductive titration of ToMOC <sub>ox</sub> with Na <sub>2</sub> S <sub>2</sub> O <sub>4</sub> . | S3  |
| <b>Figure S2.</b>  | UV-vis spectrum of the reaction of ToMOC <sub>ox</sub> with 20 equiv SNAP.                                             | S4  |
| <b>Figure S3.</b>  | UV-vis spectra of the reaction of ToMOC <sub>ox</sub> with 0.67, 1.33, 2.67, and 6.67 equiv DEANO.                     | S5  |
| <b>Figure S4.</b>  | UV-vis spectrum of the reaction of ToMOC <sub>ox</sub> with ~120 equiv NO (g).                                         | S6  |
| <b>Figure S5.</b>  | UV-vis spectrum of the reaction of ToMOC <sub>red</sub> with 20 equiv DEANO.                                           | S7  |
| <b>Figure S6.</b>  | 77 K EPR spectrum of ToMOC <sub>red</sub> .                                                                            | S8  |
| <b>Figure S7.</b>  | 77 K EPR spectrum of the reaction of ToMOC <sub>ox</sub> with 2 equiv SNAP.                                            | S9  |
| <b>Figure S8.</b>  | 77 K EPR spectrum of the reaction of ToMOC <sub>ox</sub> with 100 equiv NO (g).                                        | S10 |
| <b>Figure S9.</b>  | 77 K EPR spectrum of the reaction of ToMOC <sub>red</sub> with 15 equiv DEANO.                                         | S11 |
| <b>Figure S10.</b> | 90 K Mössbauer spectrum of ToMOC <sub>ox</sub> .                                                                       | S12 |
| <b>Figure S11.</b> | 230 K Mössbauer spectrum of ToMOC <sub>red</sub> .                                                                     | S13 |
| <b>Figure S12.</b> | NRVS spectra of ToMOC <sub>NO</sub> and synthetic model compounds.                                                     | S14 |
| <b>Figure S13.</b> | Kinetics of anaerobic rRRE decay.                                                                                      | S15 |
| <b>Figure S14.</b> | 77 K Mössbauer spectrum of ToMOC <sub>NO</sub> treated with 1 equiv of Na <sub>2</sub> S <sub>2</sub> O <sub>4</sub> . | S16 |
| <b>Figure S15.</b> | Plots of $k_{\text{obs}}$ versus [DEANO].                                                                              | S17 |

**Table S1.** Comparison of 90 K  $^{57}\text{Fe}$  Mössbauer parameters for ToMOC-derived and synthetic iron dinitrosyl species recorded at zero-field.

| Compound                                                                                  | Isomer Shift,<br>$\delta$ (mm/s) | Quadrupole Splitting,<br>$\Delta E_Q$ (mm/s) | Linewidth, $\Gamma$<br>(mm/s) | Ref       |
|-------------------------------------------------------------------------------------------|----------------------------------|----------------------------------------------|-------------------------------|-----------|
| (Et <sub>4</sub> N)[Fe(NO) <sub>2</sub> (SPh) <sub>2</sub> ] (DNIC)                       | 0.17(2)                          | 0.68(2)                                      | 0.26(2)                       | 1         |
| [Fe <sub>2</sub> ( $\mu$ -SPh) <sub>2</sub> (NO) <sub>4</sub> ] (RRE)                     | 0.15(2)                          | 0.97(2)                                      | 0.29(2)                       | 1         |
| (Et <sub>4</sub> N)[Fe <sub>4</sub> ( $\mu_3$ -S) <sub>3</sub> (NO) <sub>7</sub> ] (RBS)  | 0.15(2)                          | 0.81(2)                                      | 0.32(2)                       | 1         |
| (Et <sub>4</sub> N)[Fe <sub>2</sub> ( $\mu$ -SPh) <sub>2</sub> (NO) <sub>4</sub> ] (rRRE) | 0.23(2)                          | 0.35(2)                                      | 0.30(2)                       | 1         |
| ToMOC <sub>ox</sub> + DEANO                                                               | 0.15(2)                          | 0.92(2)                                      | 0.29(2)                       | this work |
| (ToMOC <sub>ox</sub> + DEANO) <sub>red</sub>                                              | 0.15(2)                          | 0.83(2)                                      | 0.31(2)                       | this work |

<sup>1</sup>Tonzetich, Z. J.; Wang, H.; Mitra, D.; Tinberg, C. E.; Do, L. H.; Jenney, F. E.; Adams, M. W. W.; Cramer, S. P.; Lippard, S. J. *J. Am. Chem. Soc.* **2010**, *132*, 6914-6916.

**Table S2.** Dependence on DEANO concentration of rate constants  $k_{\text{obs1}}$ ,  $k_{\text{obs2}}$ , and  $k_{\text{obs3}}$  for the reaction of ToMOC<sub>ox</sub> with DEANO at 25 °C in 25 mM KPi, pH 7.0.

| [DEANO] (mM) | $k_{\text{obs1}}$ (s <sup>-1</sup> ) | $k_{\text{obs2}}$ (s <sup>-1</sup> ) | $k_{\text{obs3}}$ (s <sup>-1</sup> ) |
|--------------|--------------------------------------|--------------------------------------|--------------------------------------|
| 0.7          | 0.092                                | 0.042                                | 0.00038                              |
| 1.4          | 0.24                                 | 0.080                                | 0.00080                              |
| 2.0          | 0.36                                 | 0.10                                 | 0.00079                              |
| 3.0          | 0.45                                 | 0.12                                 | 0.0013                               |
| 4.0          | 0.61                                 | 0.13                                 | 0.0015                               |

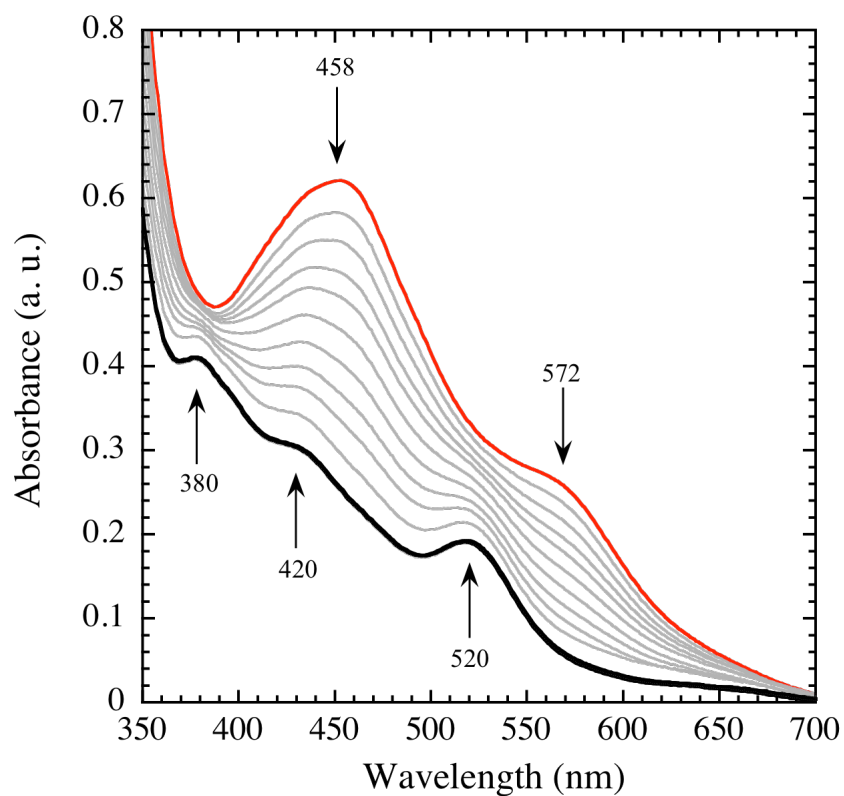

**Figure S1.** UV-vis spectra of the anaerobic titration of 93  $\mu\text{M}$  ToMOC<sub>ox</sub> with 937  $\mu\text{M}$  Na<sub>2</sub>S<sub>2</sub>O<sub>4</sub> at 25 °C in 25 mM KPi buffer, pH 7.0. A solution of Na<sub>2</sub>S<sub>2</sub>O<sub>4</sub> was added to ToMOC<sub>ox</sub> in 5  $\mu\text{L}$  aliquots. Spectra of ToMOC<sub>ox</sub> (red) and ToMOC<sub>ox</sub> titrated with 5, 10, 15, 20, 25, 30, 35, 40, 45, 55, 60, and 65 (black)  $\mu\text{L}$  of Na<sub>2</sub>S<sub>2</sub>O<sub>4</sub> are depicted. The last three spectra overlap, indicating reaction completion.

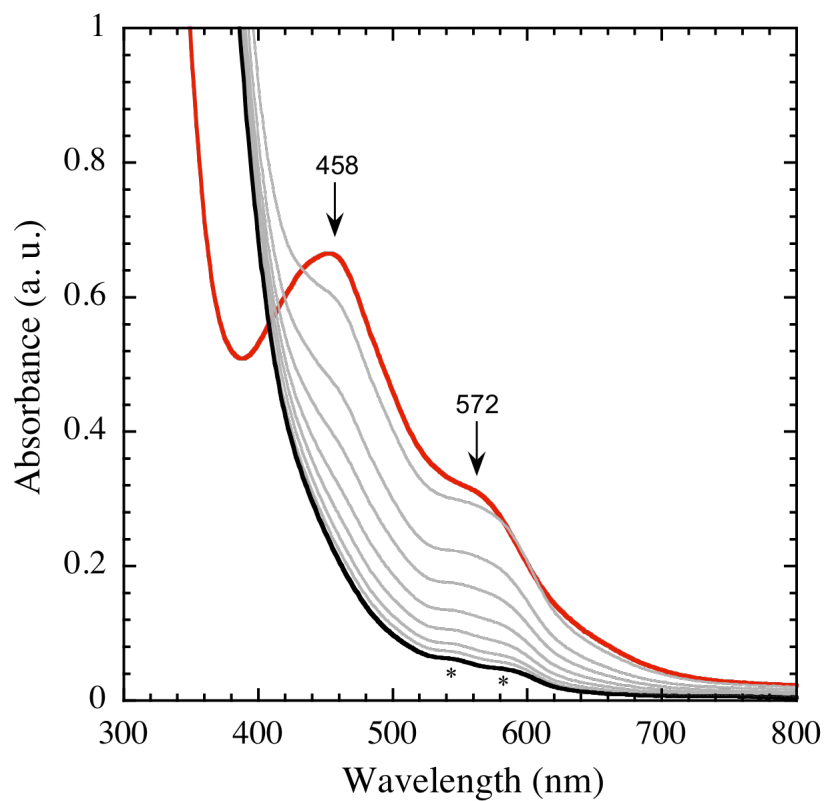

**Figure S2.** UV-vis spectral changes associated with the anaerobic reaction of 91  $\mu\text{M}$  ToMOC<sub>ox</sub> with 20 equiv of SNAP at 25 °C in 25 mM KP<sub>i</sub> buffer, pH 7.0. Data show the spectra before reaction (red), and at 1 min, 20 min, 40 min, 60 min, 80 min, 100 min, 120 min, and 140 min (black) after reaction initiation. Peaks denoted with an asterisk are due to SNAP.

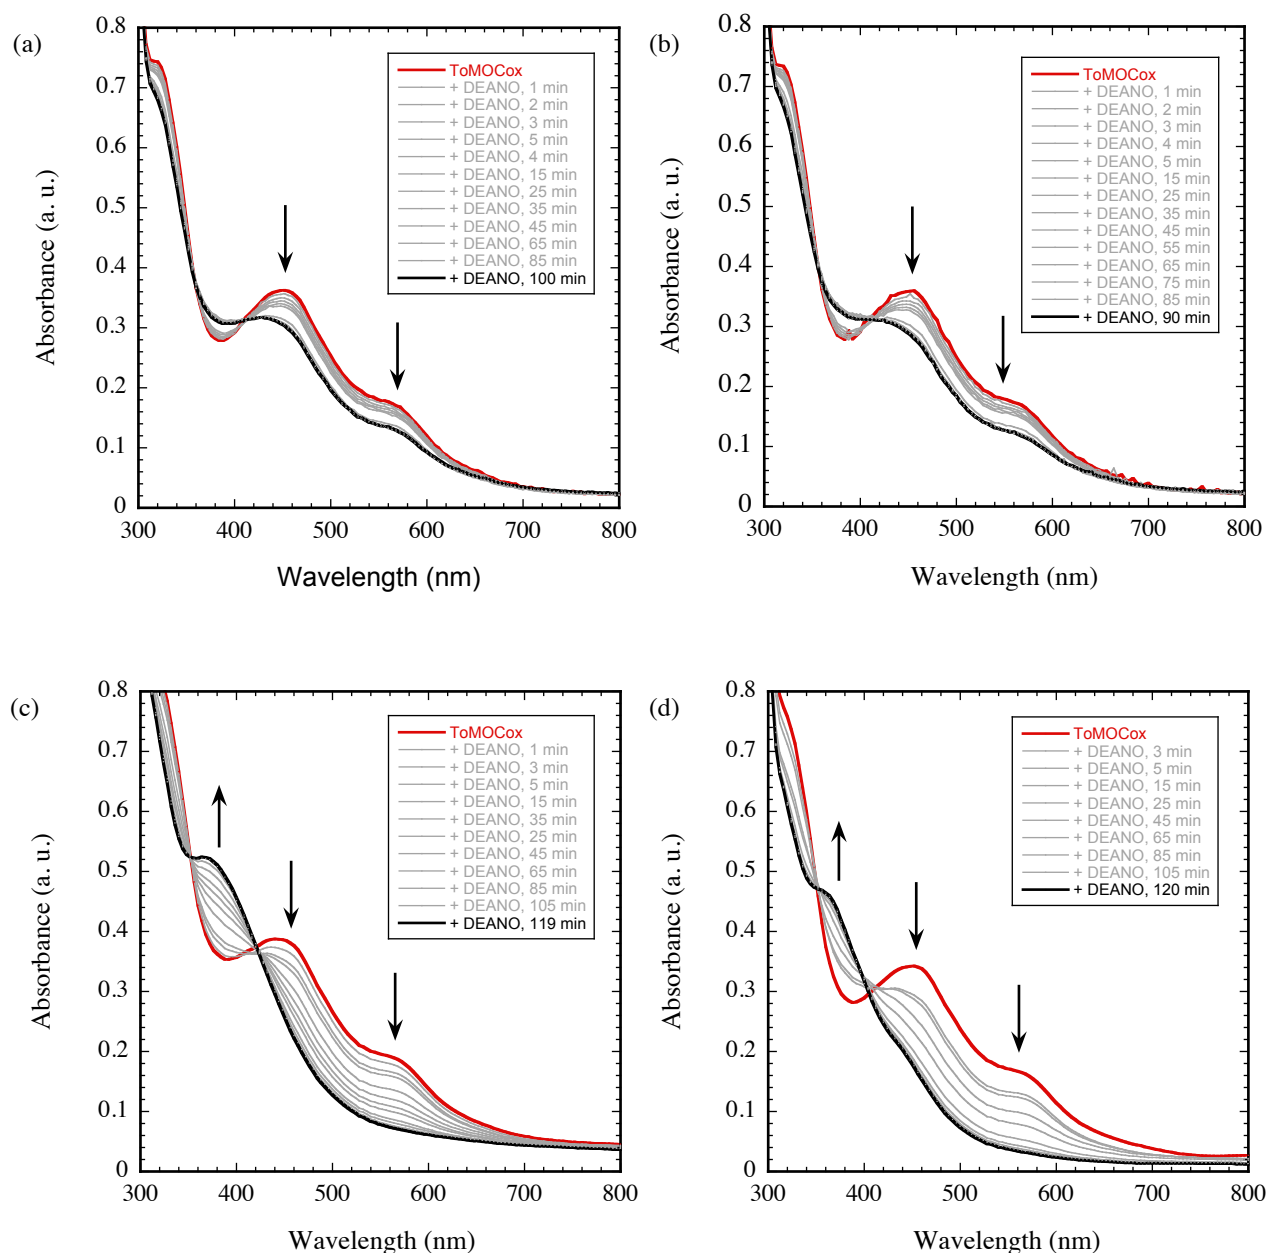

**Figure S3.** UV-vis spectral changes associated with the anaerobic reaction of 60  $\mu\text{M}$  ToMOC<sub>ox</sub> with 0.67 equiv DEANO (1 equiv NO) (a), 1.33 equiv DEANO (2 equiv NO) (b), 2.67 equiv DEANO (4 equiv NO) (c), and 6.67 equiv DEANO (10 equiv NO) (d) at 25 °C in 25 mM KP<sub>i</sub> buffer, pH 7.0. Data show the spectra before reaction (red), and various times after reaction initiation.

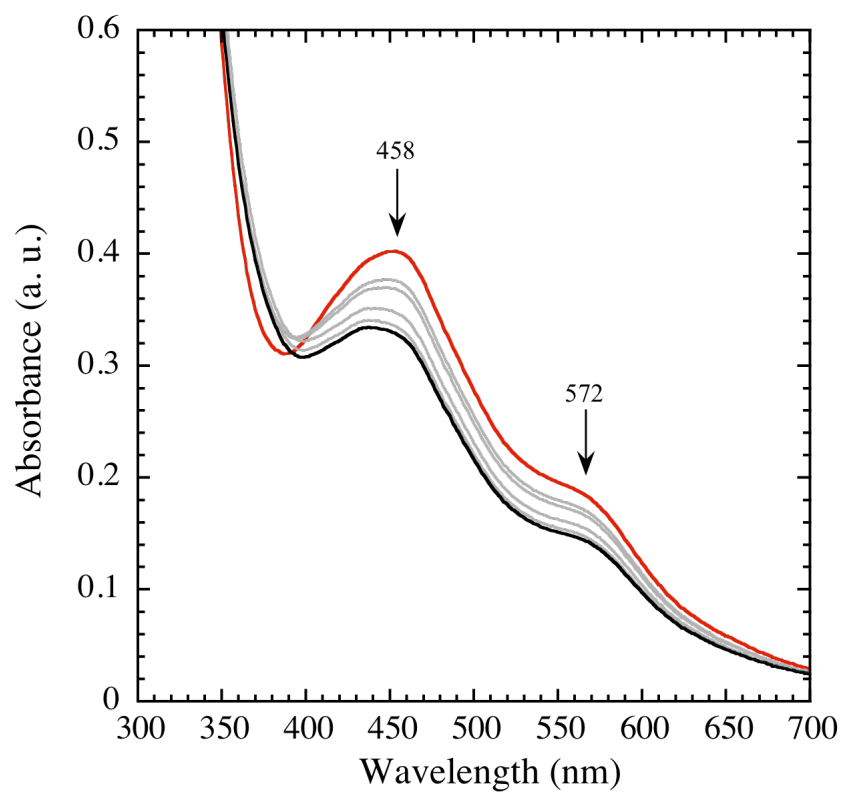

**Figure S4.** UV-vis spectral changes associated with the anaerobic reaction of 58 μM ToMOC<sub>ox</sub> with ~120 equiv of NO (g) at 25 °C in 25 mM KP<sub>i</sub> buffer, pH 7.0. Data show the spectra before reaction (red), and at 10 min, 25 min, 60 min, 80 min, and 90 min (black) after reaction initiation.

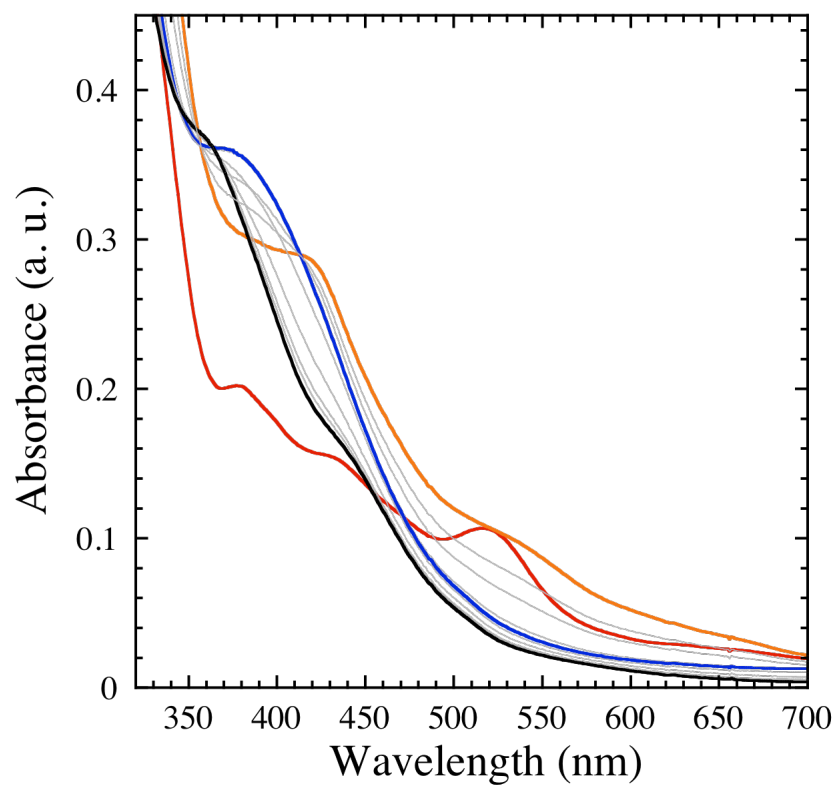

**Figure S5.** UV-vis spectral changes associated with the anaerobic reaction of 40  $\mu\text{M}$  ToMOC<sub>red</sub> with 20 equiv of DEANO at 25 °C in 25 mM KP<sub>i</sub> buffer, pH 7.0. Data show the spectra before reaction (red), and at intervals after reaction initiation, including 30 s (orange), 5 min (blue), and 64 min (black). The colored spectra reveal clear isosbestic points over the course of the reaction.

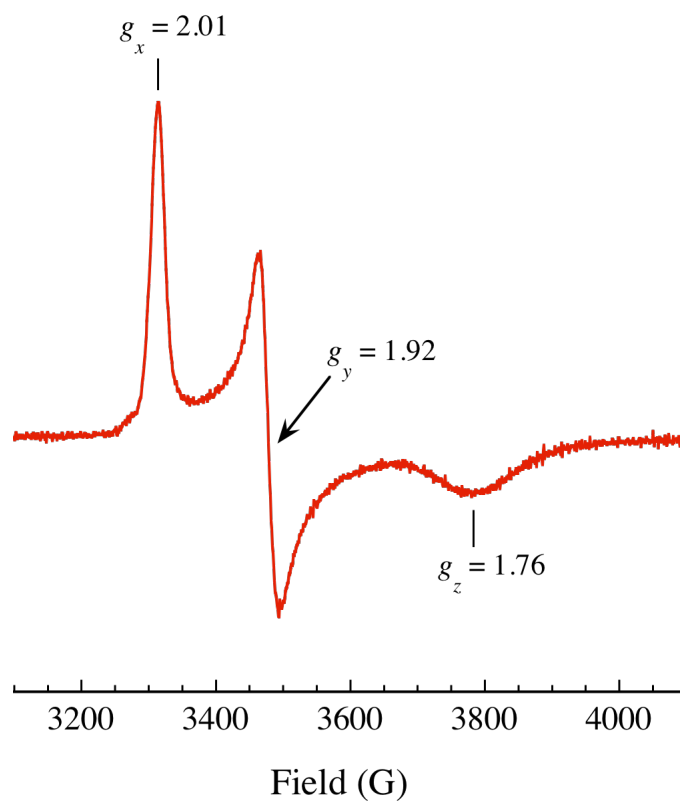

**Figure S6.** X-Band EPR spectrum (77 K) of 467  $\mu\text{M}$  ToMOC<sub>red</sub> in 25 mM KP<sub>i</sub>, pH 7.0. Instrument parameters: 9.332 GHz microwave frequency; 0.201 mW microwave power;  $5.02 \times 10^4$  receiver gain; 100.0 kHz modulation frequency; 8.00 G modulation amplitude; 20.480 ms time constant.

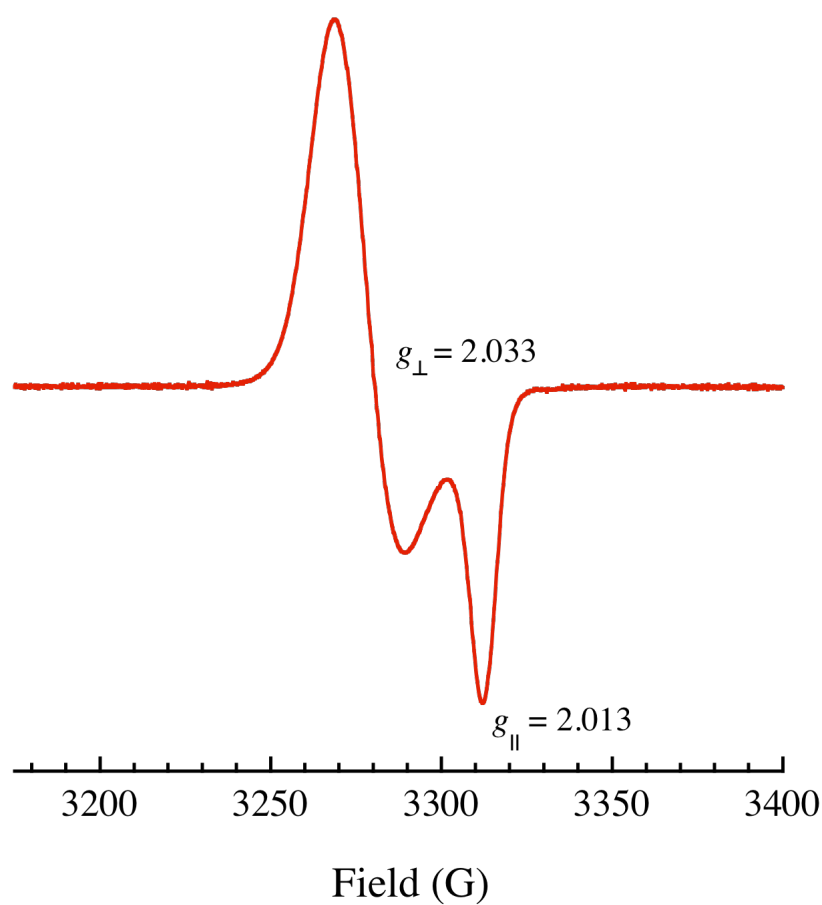

**Figure S7.** X-Band EPR spectrum (77 K) of the DNIC species formed from reaction of 250  $\mu\text{M}$  ToMOC<sub>ox</sub> with 20 equiv of SNAP after 1 h at 25 °C in 25 mM KP<sub>i</sub>, pH 7.0. Instrument parameters: 9.332 GHz microwave frequency; 0.201 mW microwave power;  $5.02 \times 10^3$  receiver gain; 100.0 kHz modulation frequency; 8.00 G modulation amplitude; 40.960 ms time constant.

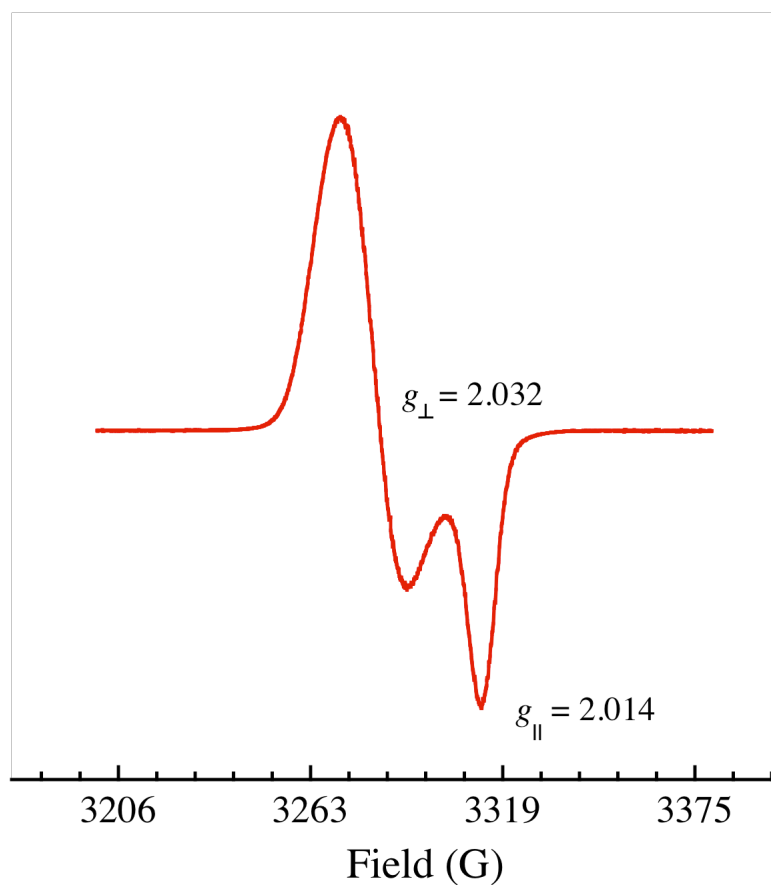

**Figure S8.** X-Band EPR spectrum (77 K) of the DNIC species formed from reaction of 250  $\mu\text{M}$  ToMOC<sub>ox</sub> with 100 equiv of NO (g) after 1 h at 25 °C in 25 mM KP<sub>i</sub>, pH 7.0. Instrument parameters: 9.332 GHz microwave frequency; 0.201 mW microwave power;  $5.02 \times 10^3$  receiver gain; 100.0 kHz modulation frequency; 8.00 G modulation amplitude; 40.960 ms time constant.

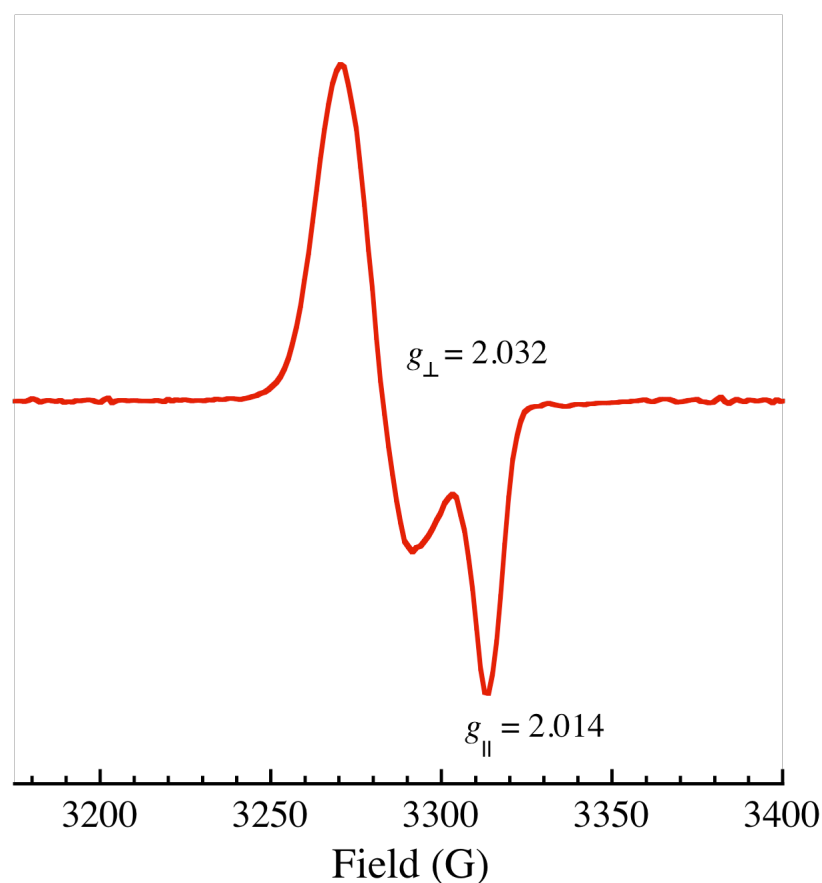

**Figure S9.** X-Band EPR spectrum (77 K) of the DNIC species formed from reaction of 250  $\mu\text{M}$  ToMOC<sub>red</sub> with 15 equiv of DEANO after 1 h at 25  $^{\circ}\text{C}$  in 25 mM  $\text{KPi}$ , pH 7.0. Instrument parameters: 9.332 GHz microwave frequency; 0.201 mW microwave power;  $1.00 \times 10^3$  receiver gain; 100.0 kHz modulation frequency; 8.00 G modulation amplitude; 40.960 ms time constant.

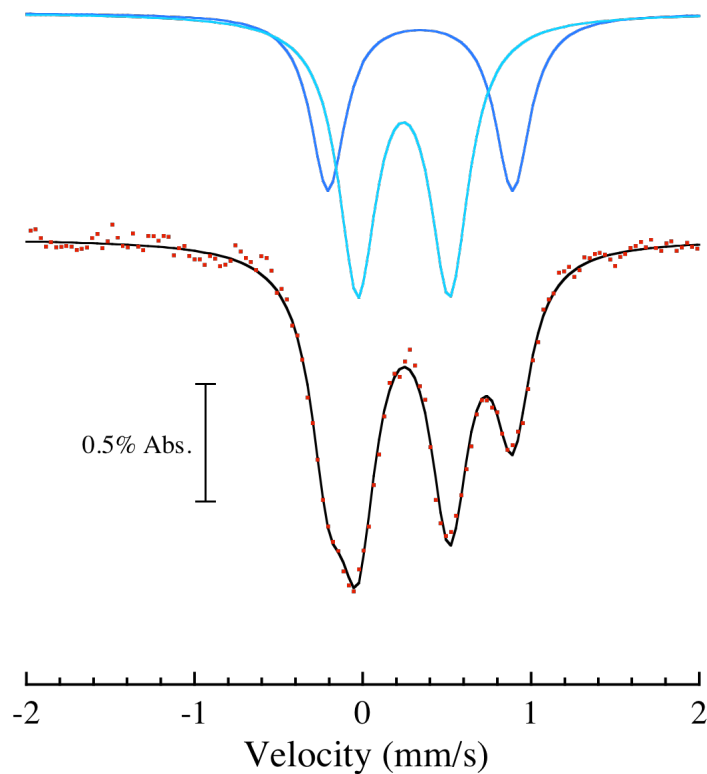

**Figure S10.** Zero-field  $^{57}\text{Fe}$  Mössbauer spectrum (90 K) of 378  $\mu\text{M}$   $^{57}\text{Fe}$ -enriched  $\text{ToMOC}_{\text{ox}}$  in 25 mM  $\text{KP}_i$ , pH 7.0. Data were fit to two quadrupole doublets with  $\delta_1 = 0.34(1)$  mm/s,  $\Delta E_{Q1} = 1.10(1)$  mm/s,  $\Gamma_1 = 0.25(1)$  mm/s,  $\delta_2 = 0.24(1)$  mm/s,  $\Delta E_{Q2} = 0.55(1)$  mm/s,  $\Gamma_2 = 0.28(1)$  mm/s (black line). Subsites 1 (cyan) and 2 (aqua), shown above the fit, accounted for 42% and 58% of the iron in the sample, respectively.

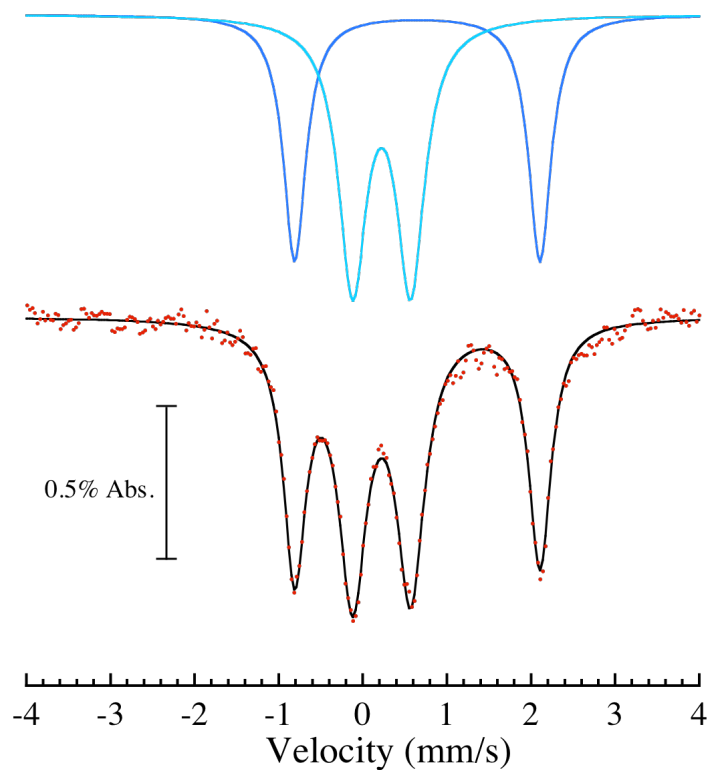

**Figure S11.** Zero-field  $^{57}\text{Fe}$  Mössbauer spectrum (230 K) of 966  $\mu\text{M}$   $^{57}\text{Fe}$ -enriched  $\text{ToMOC}_{\text{red}}$  in 25 mM  $\text{KP}_i$ , pH 7.0. Data were fit to two quadrupole doublets with  $\delta_1 = 0.65(1)$  mm/s,  $\Delta E_{Q1} = 2.92(1)$  mm/s,  $\Gamma_1 = 0.32(1)$  mm/s,  $\delta_2 = 0.23(1)$  mm/s,  $\Delta E_{Q2} = 0.69(1)$  mm/s,  $\Gamma_2 = 0.40(1)$  mm/s (black line). Subsites 1 (cyan) and 2 (aqua), shown above the fit, accounted for 43% and 57% of the iron in the sample, respectively.

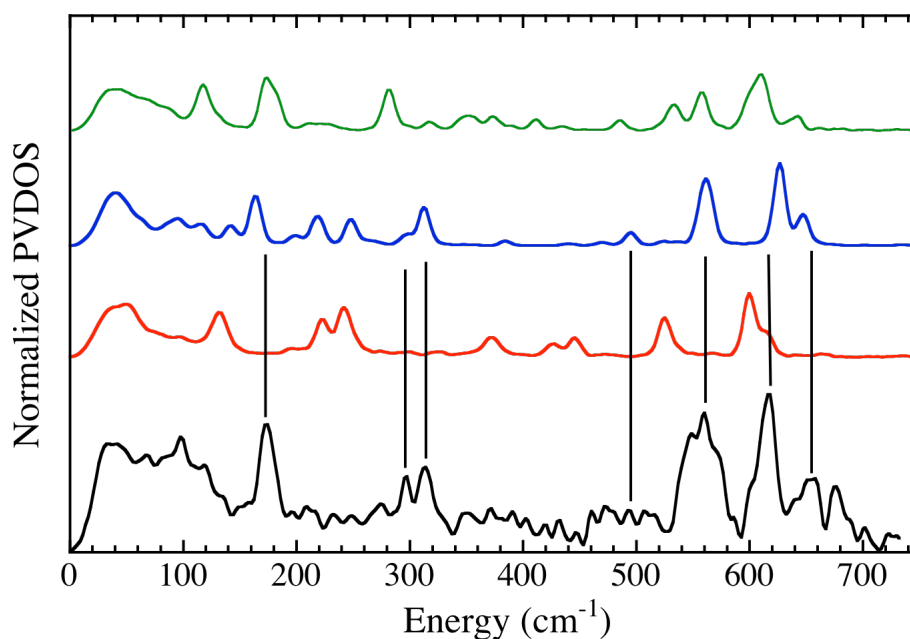

**Figure S12.** Normalized  $^{57}\text{Fe}$  partial vibrational density of states (PVDOS) for 1.66 mM  $^{57}\text{Fe}$ -enriched  $\text{ToMOC}_{\text{ox}}$  treated with 10 equiv of DEANO for 1 h at 25 °C in 25 mM  $\text{KP}_i$  buffer, pH 7.0 (black) compared to those of  $(\text{Et}_4\text{N})[\text{Fe}(\text{NO})_2(\text{SPh})_2]$  (DNIC; red),  $[\text{Fe}_2(\mu\text{-SPh})_2(\text{NO})_4]$  (RRE; blue), and  $(\text{Et}_4\text{N})[\text{Fe}_4(\mu\text{-S})_3(\text{NO})_7]$  (RBS; green). Data for the model compounds are taken from Tonzetich, Z. J.; Wang, H.; Mitra, D.; Tinberg, C. E.; Do, L. H.; Jenney, F. E.; Adams, M. W. W.; Cramer, S. P.; Lippard, S. J. *J. Am. Chem. Soc.* **2010**, *132*, 6914-6916.

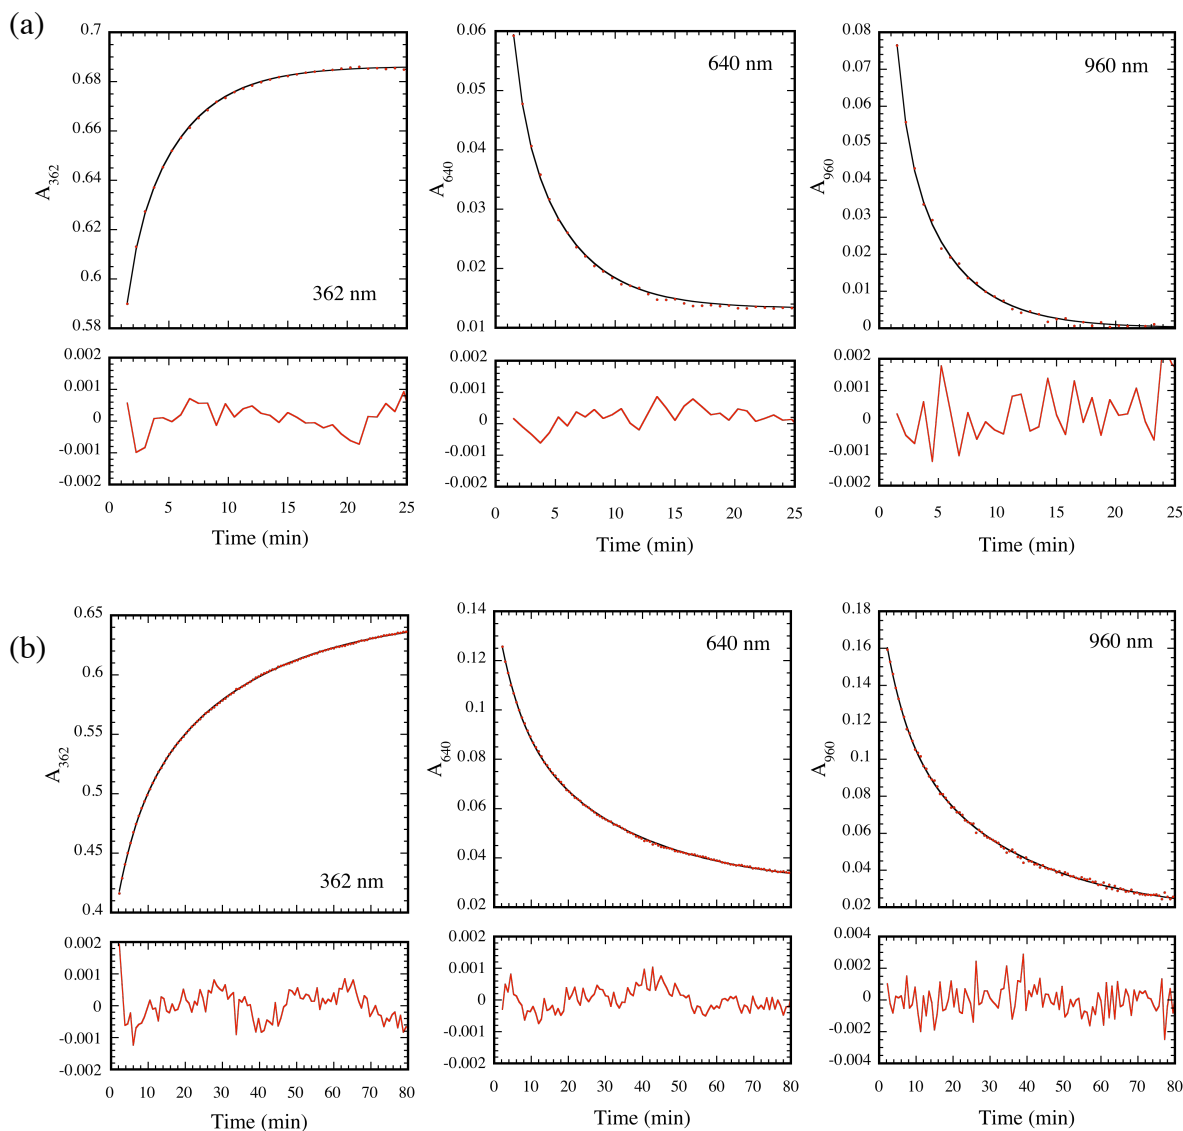

**Figure S13.** (a) Anaerobic decay kinetics (red points) of the rRRE formed from ToMOC<sub>NO</sub> generated by reaction of 80  $\mu$ M ToMOC<sub>ox</sub> with 10 equiv DEANO for 1 h at 25 °C with 0.5 equiv of Na<sub>2</sub>S<sub>2</sub>O<sub>4</sub> in 25 mM KP<sub>i</sub>, pH 7.0. (b) Anaerobic decay kinetics (red points) of the product of (a) treated a second time with 0.5 equiv of Na<sub>2</sub>S<sub>2</sub>O<sub>4</sub>. All data were fit using the two exponential function  $y = A_1 \exp(-k_{\text{obs1}} * t) + A_2 \exp(-k_{\text{obs2}} * t) + \text{Abs}_{t=\infty}$ , where  $t$  is time,  $A_1$  and  $A_2$  are the pre-exponential factors for the two processes,  $k_{\text{obs1}}$  and  $k_{\text{obs2}}$  are the rate constants for the two processes, and  $\text{Abs}_{t=\infty}$  is the final absorbance value (black lines). Attempts to fit the data to a one exponential function describing a single process yielded poor fit statistics and residual plots (not shown). Data were fit at 362 nm, 640 nm, and 960 nm simultaneously using shared rate constant parameters. Residual plots are shown in the bottom panels of (a) and (b). For (a),  $k_{\text{obs1}} = 1.10 \text{ min}^{-1}$  and  $k_{\text{obs2}} = 0.23 \text{ min}^{-1}$ . For (b),  $k_{\text{obs1}} = 0.17 \text{ min}^{-1}$  and  $k_{\text{obs2}} = 0.031 \text{ min}^{-1}$ .

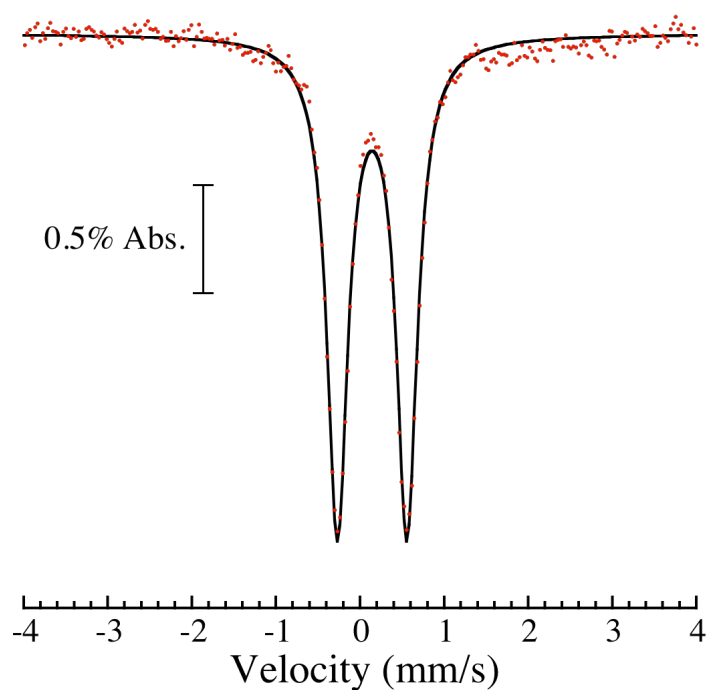

**Figure S14.** Zero-field  $^{57}\text{Fe}$  Mössbauer spectrum (90 K) of the DNIC species formed by incubation of 700  $\mu\text{M}$   $^{57}\text{Fe}$ -enriched  $\text{ToMOC}_{\text{ox}}$  with 34 equiv DEANO for 1 h at 25  $^{\circ}\text{C}$  followed by treatment with 1 equiv  $\text{Na}_2\text{S}_2\text{O}_4$ . Reactions were performed in 25 mM  $\text{KP}_i$ , pH 7.0. Data were fit to a single quadrupole doublet with  $\delta = 0.15(2)$  mm/s,  $\Delta E_Q = 0.83(2)$  mm/s, and  $\Gamma = 0.31(2)$  mm/s (black line).

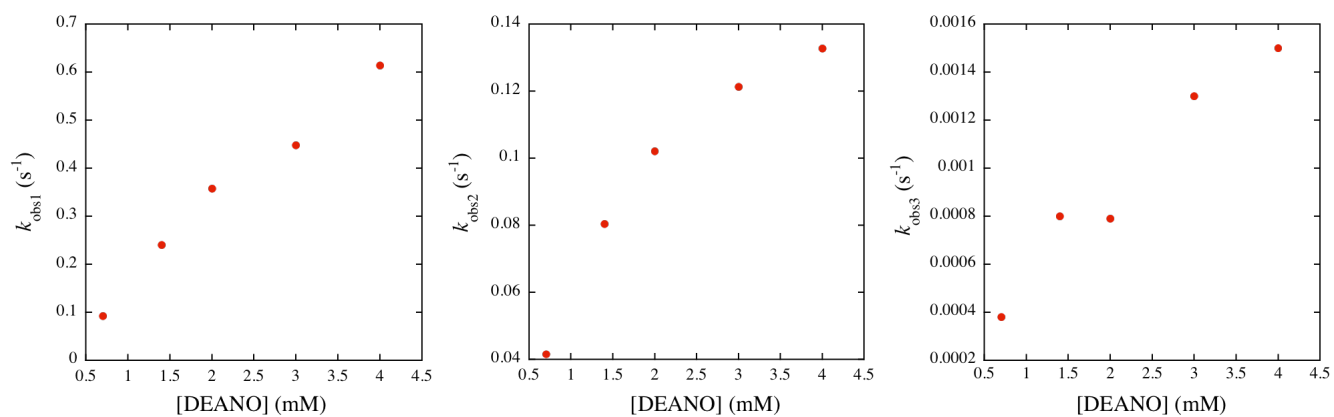

**Figure S15.** Plots of  $k_{\text{obs}}$  versus [DEANO] for the reaction of ToMOC<sub>ox</sub> with DEANO at 25 °C in 25 mM KP<sub>i</sub>, pH 7.0.
